# Supplementary material for: Leishmania infantum isolates exhibit high infectivity and reduced susceptibility to amphotericin B
Source: Royal Society of Chemistry journal article supplement (doi:10.1039/d0md00073f), 2020-01-01

## Supplementary Material

### Figure S1.

PCR-RFLP of the *hsp70* gene with *Mlu*I restriction enzyme for the identification of the isolates (bPL, gPL, gCH, bCH. Final lanes LPC-RPV and HU3, correspond to reference strains of *L. infantum* and *L. donovani*, respectively).

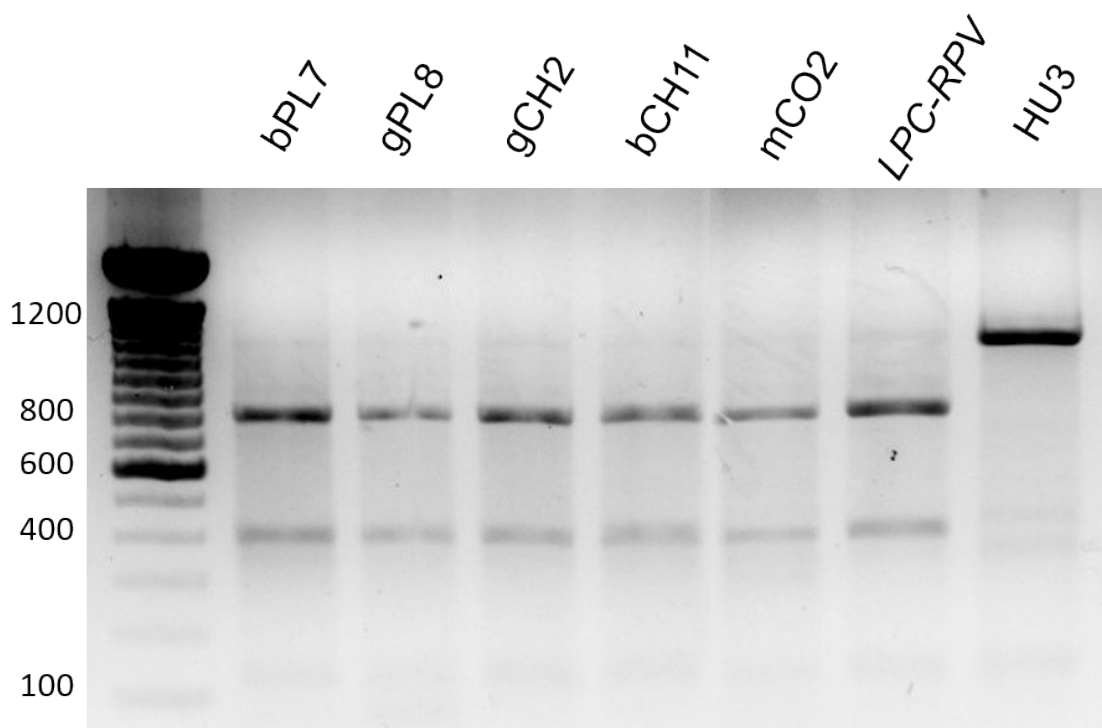

### Figure S2.

Comparative growth curve between the different strains in semi defined medium.  $IC_{50}$  of the different strains against a series of drugs Nifurtimox (B), Miltefosine (C), Glucantime (D), Amphotericin B (E) and Mevinoline (F). For amphotericin B and Mevinoline statistical differences were determined using paired t-test ( $p$ -value < 0.05).

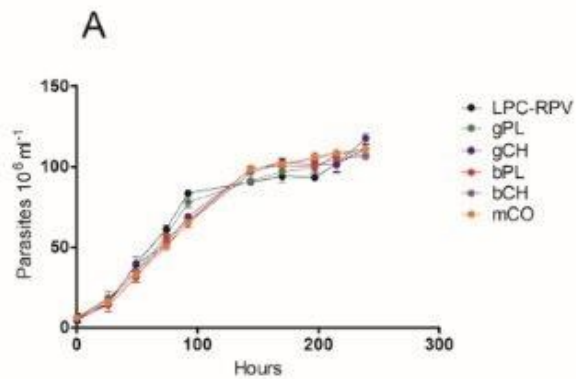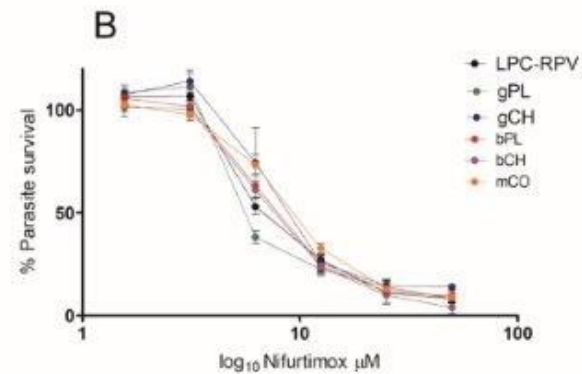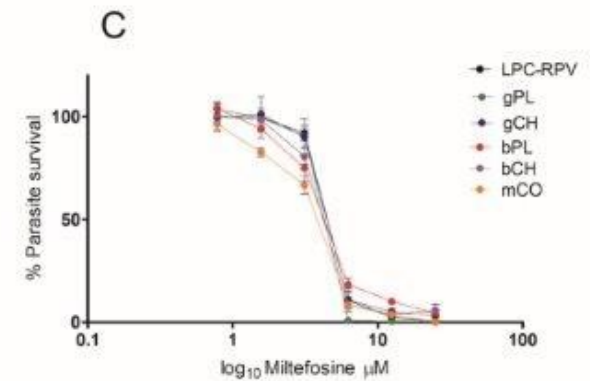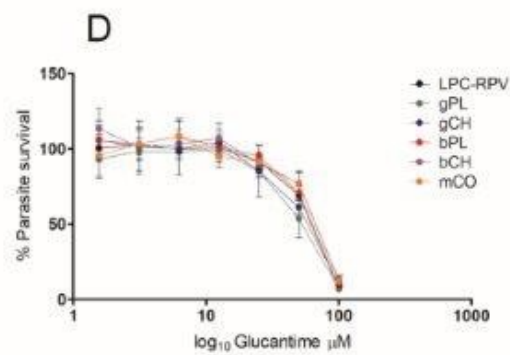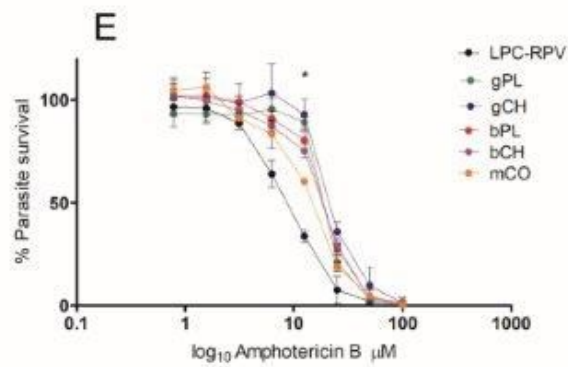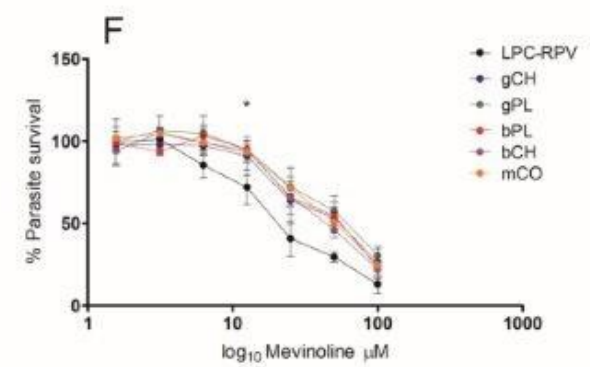

Supplement: d0md00073f1.pdf [file d0md00073f1.pdf]
